# Supplementary material for: Age‐Dependent Association Between Modifiable Risk Factors and Incident Cardiovascular Disease
Source: PubMed Central journal article supplement — J Am Heart Assoc. 2023 Jan 11;12(2):e027684. doi: 10.1161/JAHA.122.027684 (PMC9939069; doi:10.1161/jaha.122.027684), 2023-01-11
Supplement: JAH3-12-e027684-s001.pdf [file JAH3-12-e027684-s001.pdf]

## **SUPPLEMENTAL MATERIAL**

**Table S1. Age Stratified Associations of Risk Factors with Incidence of Cardiovascular Disease**

|                                         | 20-49 Years<br>(n=2,008,559) | 50-59 Years<br>(n=712,273) | 60-75 Years<br>(n=307,007) | P for interaction |
|-----------------------------------------|------------------------------|----------------------------|----------------------------|-------------------|
| <b>Myocardial Infarction</b>            |                              |                            |                            |                   |
| Number of Events                        | 2,573                        | 2,473                      | 1,269                      |                   |
| Incidence Rate (per 10,000 person-year) | 4.1 (3.9-4.3)                | 10.6 (10.2-11.1)           | 16.3 (15.4-17.2)           |                   |
| Age                                     | 1.07 (1.06-1.07)             | 1.05 (1.03-1.06)           | 1.07 (1.05-1.08)           | -----             |
| Men                                     | 1.63 (1.47-1.82)             | 2.31 (2.05-2.59)           | 2.58 (2.22-3.01)           | -----             |
| Obesity                                 | 1.47 (1.35-1.61)             | 1.43 (1.31-1.55)           | 1.03 (0.91-1.16)           | <0.001            |
| Hypertension                            | 1.96 (1.79-2.15)             | 1.55 (1.42-1.68)           | 1.40 (1.25-1.57)           | <0.001            |
| Diabetes Mellitus                       | 2.30 (2.02-2.61)             | 1.65 (1.48-1.83)           | 1.55 (1.35-1.78)           | <0.001            |
| Dyslipidemia                            | 1.68 (1.54-1.83)             | 1.76 (1.61-1.92)           | 1.52 (1.35-1.72)           | 0.12              |
| Cigarette Smoking                       | 1.73 (1.60-1.88)             | 1.81 (1.67-1.97)           | 1.48 (1.31-1.67)           | 0.023             |
| Physical Inactivity                     | 1.04 (0.96-1.12)             | 1.01 (0.93-1.10)           | 1.12 (1.00-1.25)           | 0.41              |
| <b>Angina Pectoris</b>                  |                              |                            |                            |                   |
| Number of Events                        | 25,484                       | 20,729                     | 10,234                     |                   |
| Incidence Rate (per 10,000 person-year) | 41.0 (40.5-41.5)             | 90.9 (89.7-92.2)           | 134.7 (132.2-137.4)        |                   |
| Age                                     | 1.06 (1.05-1.06)             | 1.03 (1.03-1.04)           | 1.05 (1.05-1.06)           | -----             |
| Men                                     | 1.10 (1.07-1.13)             | 1.09 (1.06-1.13)           | 1.16 (1.11-1.21)           | -----             |
| Obesity                                 | 1.22 (1.18-1.26)             | 1.17 (1.13-1.20)           | 1.16 (1.11-1.21)           | 0.10              |
| Hypertension                            | 1.81 (1.76-1.87)             | 1.53 (1.48-1.57)           | 1.37 (1.32-1.43)           | <0.001            |
| Diabetes Mellitus                       | 1.60 (1.52-1.69)             | 1.37 (1.31-1.43)           | 1.22 (1.15-1.29)           | <0.001            |
| Dyslipidemia                            | 1.24 (1.21-1.27)             | 1.23 (1.20-1.27)           | 1.17 (1.12-1.22)           | 0.029             |

|                     |                  |                  |                  |       |
|---------------------|------------------|------------------|------------------|-------|
| Cigarette Smoking   | 1.01 (0.98-1.03) | 1.05 (1.02-1.09) | 1.05 (1.00-1.10) | 0.037 |
| Physical Inactivity | 1.05 (1.03-1.08) | 1.04 (1.01-1.06) | 1.09 (1.05-1.14) | 0.091 |

---

#### Stroke

---

|                                         |                  |                  |                  |        |
|-----------------------------------------|------------------|------------------|------------------|--------|
| Number of Events                        | 10,385           | 10,877           | 6,817            |        |
| Incidence Rate (per 10,000 person-year) | 16.6 (16.3-16.9) | 47.2 (46.3-48.1) | 88.9 (86.8-91.0) |        |
| Age                                     | 1.09 (1.08-1.09) | 1.06 (1.05-1.07) | 1.08 (1.07-1.09) | -----  |
| Men                                     | 0.93 (0.89-0.98) | 1.05 (1.01-1.10) | 1.05 (0.99-1.10) | -----  |
| Obesity                                 | 1.15 (1.10-1.20) | 1.02 (0.98-1.07) | 1.01 (0.95-1.07) | 0.001  |
| Hypertension                            | 2.33 (2.23-2.44) | 1.75 (1.68-1.82) | 1.48 (1.41-1.56) | <0.001 |
| Diabetes Mellitus                       | 1.33 (1.22-1.45) | 1.30 (1.22-1.38) | 1.17 (1.09-1.25) | 0.042  |
| Dyslipidemia                            | 1.11 (1.07-1.16) | 1.11 (1.07-1.16) | 1.05 (1.00-1.11) | 0.20   |
| Cigarette Smoking                       | 1.20 (1.15-1.26) | 1.16 (1.11-1.21) | 1.24 (1.17-1.32) | 0.12   |
| Physical Inactivity                     | 1.05 (1.00-1.09) | 1.06 (1.02-1.10) | 1.03 (0.98-1.08) | 0.58   |

---

#### Heart Failure

---

|                                         |                  |                  |                     |        |
|-----------------------------------------|------------------|------------------|---------------------|--------|
| Number of Events                        | 24,318           | 20,422           | 11,629              |        |
| Incidence Rate (per 10,000 person-year) | 39.1 (38.6-39.6) | 89.4 (88.1-90.6) | 153.2 (150.5-156.0) |        |
| Age                                     | 1.05 (1.05-1.05) | 1.05 (1.04-1.05) | 1.07 (1.06-1.07)    | -----  |
| Men                                     | 0.94 (0.91-0.97) | 1.19 (1.15-1.23) | 1.23 (1.18-1.28)    | -----  |
| Obesity                                 | 1.35 (1.31-1.39) | 1.25 (1.21-1.29) | 1.23 (1.18-1.28)    | 0.003  |
| Hypertension                            | 2.45 (2.38-2.53) | 1.87 (1.82-1.93) | 1.62 (1.56-1.68)    | <0.001 |
| Diabetes Mellitus                       | 1.55 (1.46-1.63) | 1.32 (1.26-1.38) | 1.13 (1.07-1.19)    | <0.001 |
| Dyslipidemia                            | 1.17 (1.13-1.20) | 1.10 (1.07-1.13) | 1.00 (0.96-1.04)    | <0.001 |
| Cigarette Smoking                       | 1.06 (1.03-1.09) | 1.06 (1.03-1.10) | 1.11 (1.06-1.16)    | <0.001 |

|                     |                  |                  |                  |       |
|---------------------|------------------|------------------|------------------|-------|
| Physical Inactivity | 1.00 (0.98-1.03) | 1.03 (1.00-1.06) | 1.08 (1.04-1.12) | 0.022 |
|---------------------|------------------|------------------|------------------|-------|

---

Participants were categorized into three groups aged 20-49 years, 50-59 years, and 60-75 years. We performed the multivariable Cox regression analyses including age, sex, obesity, hypertension, diabetes mellitus, dyslipidemia, cigarette smoking, and physical inactivity. Hazard ratios (95% confidence interval) are presented.

**Table S2. Relative Risk Reduction for Cardiovascular Disease Event with Risk Factors**

|                              | 20-49 Years<br>(n=2,008,559) | 50-59 Years<br>(n=712,273) | 60-75 Years<br>(n=307,007) | Overall<br>(n=3,027,839) |
|------------------------------|------------------------------|----------------------------|----------------------------|--------------------------|
| <b>Myocardial Infarction</b> |                              |                            |                            |                          |
| Obesity                      | 32.1% (25.9%-37.7%)          | 29.9% (23.6%-35.6%)        | 2.5% (-10.6%-14.1%)        | 27.6% (23.6%-31.4%)      |
| Hypertension                 | 49.1% (44.2%-53.6%)          | 35.4% (29.6%-40.6%)        | 28.4% (19.6%-36.2%)        | 39.6% (36.0%-42.9%)      |
| Diabetes Mellitus            | 56.5% (50.4%-61.8%)          | 39.3% (32.3%-45.5%)        | 35.5% (25.7%-43.9%)        | 43.6% (39.4%-47.6%)      |
| Dyslipidemia                 | 40.4% (35.1%-45.3%)          | 43.1% (37.7%-48.0%)        | 34.4% (25.9%-42.0%)        | 40.6% (37.2%-43.7%)      |
| Cigarette Smoking            | 42.3% (37.5%-46.8%)          | 44.8% (40.2%-49.1%)        | 32.2% (23.5%-40.0%)        | 42.0% (38.9%-44.9%)      |
| Physical Inactivity          | 3.4% (-4.6%-10.8%)           | 1.2% (-7.1%-8.8%)          | 10.5% (0.0%-20.0%)         | 4.7% (-0.2%-9.4%)        |
| <b>Angina Pectoris</b>       |                              |                            |                            |                          |
| Obesity                      | 18.0% (15.6%-20.3%)          | 14.4% (11.7%-17.0%)        | 13.5% (9.5%-17.2%)         | 17.2% (15.6%-18.7%)      |
| Hypertension                 | 44.9% (43.1%-46.6%)          | 34.5% (32.6%-36.4%)        | 27.0% (24.0%-29.9%)        | 36.9% (35.6%-38.1%)      |
| Diabetes Mellitus            | 37.6% (34.1%-41.0%)          | 26.8% (23.5%-29.9%)        | 18.0% (13.3%-22.4%)        | 26.6% (24.4%-28.7%)      |
| Dyslipidemia                 | 19.3% (17.1%-21.5%)          | 18.8% (16.5%-21.1%)        | 14.4% (10.8%-17.9%)        | 19.0% (17.6%-20.4%)      |
| Cigarette Smoking            | 0.6% (-2.3%-3.3%)            | 5.0% (2.0%-7.9%)           | 4.3% (-0.4%-8.9%)          | 3.4% (1.6%-5.3%)         |
| Physical Inactivity          | 5.0% (2.6%-7.4%)             | 3.4% (0.7%-6.1%)           | 8.6% (5.0%-12.1%)          | 5.8% (4.2%-7.3%)         |
| <b>Stroke</b>                |                              |                            |                            |                          |
| Obesity                      | 12.9% (8.8%-16.8%)           | 2.2% (-2.1%-6.4%)          | 0.7% (-5.0%-6.1%)          | 7.8% (5.2%-10.2%)        |
| Hypertension                 | 57.1% (55.1%-59.1%)          | 42.7% (40.4%-45.0%)        | 32.6% (29.2%-35.8%)        | 45.1% (43.6%-46.5%)      |

|                     |                     |                     |                     |                     |
|---------------------|---------------------|---------------------|---------------------|---------------------|
| Diabetes Mellitus   | 24.8% (17.9%-31.1%) | 22.9% (17.9%-27.5%) | 14.5% (8.4%-20.1%)  | 19.2% (15.9%-22.5%) |
| Dyslipidemia        | 10.2% (6.2%-14.0%)  | 10.2% (6.6%-13.7%)  | 5.2% (0.3%-9.8%)    | 9.8% (7.5%-12.0%)   |
| Cigarette Smoking   | 17.0% (13.3%-20.5%) | 13.6% (9.8%-17.2%)  | 19.4% (14.7%-24.0%) | 16.7% (14.4%-18.9%) |
| Physical Inactivity | 4.3% (0.5%-8.0%)    | 5.9% (2.2%-9.4%)    | 3.0% (-1.8%-7.5%)   | 5.2% (3.0%-7.5%)    |
| <hr/>               |                     |                     |                     |                     |
| Heart Failure       |                     |                     |                     |                     |
| <hr/>               |                     |                     |                     |                     |
| Obesity             | 25.9% (23.7%-28.0%) | 19.9% (17.4%-22.3%) | 18.5% (15.0%-21.7%) | 23.3% (21.9%-24.7%) |
| Hypertension        | 59.2% (58.0%-60.5%) | 46.6% (45.0%-48.1%) | 38.1% (35.7%-40.4%) | 50.1% (49.1%-51.0%) |
| Diabetes Mellitus   | 35.3% (31.7%-38.8%) | 24.1% (20.7%-27.3%) | 11.5% (6.8%-16.0%)  | 23.3% (21.0%-25.5%) |
| Dyslipidemia        | 14.3% (11.8%-16.7%) | 8.9% (6.3%-11.5%)   | -0.2% (-4.1%-3.5%)  | 9.0% (7.4%-10.6%)   |
| Cigarette Smoking   | 5.3% (2.5%-8.0%)    | 6.1% (3.1%-9.0%)    | 9.8% (5.7%-13.8%)   | 6.6% (4.8%-8.4%)    |
| Physical Inactivity | 0.2% (-2.4%-2.8%)   | 3.1% (0.4%-5.7%)    | 7.6% (4.1%-11.0%)   | 2.9% (1.3%-4.5%)    |

Participants were categorized into three groups aged 20-49 years, 50-59 years, and 60-75 years.

**Table S3. Age Stratified Associations of Risk Factors with Incidence of Cardiovascular Disease After Multiple Imputations**

|                                         | 20-49 Years<br>(n=2,540,552) | 50-59 Years<br>(n=847,622) | 60-75 Years<br>(n=367,288) | P for interaction |
|-----------------------------------------|------------------------------|----------------------------|----------------------------|-------------------|
| <b>Myocardial Infarction</b>            |                              |                            |                            |                   |
| Number of Events                        | 3,413                        | 3,157                      | 1,504                      |                   |
| Incidence Rate (per 10,000 person-year) | 4.0 (3.9-4.2)                | 10.9 (10.6-11.3)           | 15.9 (15.1-16.7)           |                   |
| Age                                     | 1.07 (1.07-1.08)             | 1.05 (1.03-1.06)           | 1.07 (1.05-1.08)           | -----             |
| Men                                     | 1.62 (1.48-1.78)             | 2.33 (2.10-2.58)           | 2.64 (2.29-3.04)           | -----             |
| Obesity                                 | 1.49 (1.39-1.61)             | 1.39 (1.29-1.50)           | 1.06 (0.95-1.19)           | <0.001            |
| Hypertension                            | 2.00 (1.85-2.16)             | 1.51 (1.40-1.62)           | 1.41 (1.27-1.57)           | <0.001            |
| Diabetes Mellitus                       | 2.18 (1.95-2.44)             | 1.62 (1.48-1.79)           | 1.48 (1.30-1.68)           | <0.001            |
| Dyslipidemia                            | 1.72 (1.59-1.85)             | 1.79 (1.65-1.94)           | 1.58 (1.42-1.77)           | 0.14              |
| Cigarette Smoking                       | 1.72 (1.60-1.85)             | 1.79 (1.66-1.92)           | 1.51 (1.35-1.69)           | 0.045             |
| Physical Inactivity                     | 1.02 (0.95-1.11)             | 1.01 (0.94-1.10)           | 1.11 (0.99-1.23)           | 0.47              |
| <b>Angina Pectoris</b>                  |                              |                            |                            |                   |
| Number of Events                        | 34,276                       | 26,254                     | 12,523                     |                   |
| Incidence Rate (per 10,000 person-year) | 40.8 (40.4-41.2)             | 92.9 (91.8-94.0)           | 135.5 (133.1-137.9)        |                   |
| Age                                     | 1.06 (1.06-1.06)             | 1.04 (1.03-1.04)           | 1.05 (1.05-1.06)           | -----             |
| Men                                     | 1.11 (1.08-1.13)             | 1.11 (1.08-1.14)           | 1.16 (1.11-1.21)           | -----             |
| Obesity                                 | 1.22 (1.19-1.25)             | 1.16 (1.13-1.19)           | 1.16 (1.12-1.21)           | 0.062             |
| Hypertension                            | 1.79 (1.74-1.84)             | 1.53 (1.49-1.57)           | 1.37 (1.32-1.42)           | <0.001            |
| Diabetes Mellitus                       | 1.60 (1.53-1.68)             | 1.39 (1.34-1.44)           | 1.23 (1.17-1.29)           | <0.001            |

|                     |                  |                  |                  |       |
|---------------------|------------------|------------------|------------------|-------|
| Dyslipidemia        | 1.25 (1.22-1.28) | 1.24 (1.21-1.27) | 1.19 (1.15-1.24) | 0.061 |
| Cigarette Smoking   | 1.01 (0.98-1.04) | 1.05 (1.03-1.09) | 1.05 (1.00-1.10) | 0.014 |
| Physical Inactivity | 1.05 (1.03-1.08) | 1.03 (1.01-1.06) | 1.09 (1.05-1.13) | 0.099 |

---

#### Stroke

---

|                                         |                  |                  |                  |        |
|-----------------------------------------|------------------|------------------|------------------|--------|
| Number of Events                        | 13,766           | 13,743           | 8,256            |        |
| Incidence Rate (per 10,000 person-year) | 16.3 (16.0-16.5) | 48.1 (47.3-48.9) | 88.5 (86.6-90.4) |        |
| Age                                     | 1.09 (1.08-1.09) | 1.06 (1.05-1.07) | 1.08 (1.07-1.09) | -----  |
| Men                                     | 0.94 (0.90-0.98) | 1.07 (1.03-1.11) | 1.05 (1.00-1.10) | -----  |
| Obesity                                 | 1.14 (1.09-1.18) | 1.03 (1.00-1.08) | 1.03 (0.97-1.08) | 0.004  |
| Hypertension                            | 2.30 (2.21-2.40) | 1.74 (1.68-1.80) | 1.49 (1.42-1.56) | <0.001 |
| Diabetes Mellitus                       | 1.37 (1.27-1.48) | 1.31 (1.24-1.39) | 1.14 (1.07-1.22) | <0.001 |
| Dyslipidemia                            | 1.11 (1.07-1.16) | 1.12 (1.08-1.16) | 1.06 (1.02-1.11) | 0.18   |
| Cigarette Smoking                       | 1.19 (1.14-1.24) | 1.16 (1.11-1.20) | 1.25 (1.18-1.32) | 0.033  |
| Physical Inactivity                     | 1.02 (0.99-1.07) | 1.04 (1.00-1.08) | 1.03 (0.98-1.08) | 0.79   |

---

#### Heart Failure

---

|                                         |                  |                  |                     |        |
|-----------------------------------------|------------------|------------------|---------------------|--------|
| Number of Events                        | 32,470           | 25,824           | 14,158              |        |
| Incidence Rate (per 10,000 person-year) | 38.6 (38.2-39.0) | 91.1 (90.0-92.3) | 153.3 (150.8-155.9) |        |
| Age                                     | 1.05 (1.05-1.06) | 1.05 (1.04-1.05) | 1.06 (1.06-1.07)    | -----  |
| Men                                     | 0.94 (0.92-0.97) | 1.20 (1.16-1.23) | 1.24 (1.20-1.29)    | -----  |
| Obesity                                 | 1.35 (1.32-1.39) | 1.25 (1.21-1.28) | 1.23 (1.19-1.28)    | <0.001 |
| Hypertension                            | 2.43 (2.37-2.50) | 1.88 (1.83-1.93) | 1.62 (1.57-1.68)    | <0.001 |
| Diabetes Mellitus                       | 1.52 (1.45-1.59) | 1.31 (1.26-1.36) | 1.13 (1.07-1.18)    | <0.001 |
| Dyslipidemia                            | 1.17 (1.14-1.20) | 1.10 (1.07-1.13) | 1.02 (0.98-1.05)    | <0.001 |



|                     |                  |                  |                  |        |
|---------------------|------------------|------------------|------------------|--------|
| Cigarette Smoking   | 1.05 (1.02-1.08) | 1.06 (1.04-1.10) | 1.12 (1.08-1.17) | <0.001 |
| Physical Inactivity | 1.00 (0.98-1.03) | 1.02 (1.00-1.05) | 1.07 (1.03-1.11) | 0.043  |

---

We analyzed 3,755,462 participants after incorporating multiple imputations for missing data. Participants were categorized into three groups aged 20-49 years, 50-59 years, and 60-75 years. We performed the multivariable Cox regression analyses including age, sex, obesity, hypertension, diabetes mellitus, dyslipidemia, cigarette smoking, and physical inactivity. Hazard ratios (95% confidence interval) are presented.

**Table S4. Age Stratified Associations of Risk Factors with Incidence of Cardiovascular Disease after Excluding Participants Taking Medications for Hypertension, Diabetes Mellitus, and Dyslipidemia**

|                                         | 20-49 Years<br>(n=1,908,287) | 50-59 Years<br>(n=555,456) | 60-75 Years<br>(n=190,807) | P for interaction |
|-----------------------------------------|------------------------------|----------------------------|----------------------------|-------------------|
| <b>Myocardial Infarction</b>            |                              |                            |                            |                   |
| Number of Events                        | 2,085                        | 1,596                      | 648                        |                   |
| Incidence Rate (per 10,000 person-year) | 3.5 (3.4-3.7)                | 8.8 (8.4-9.2)              | 13.3 (12.3-14.4)           |                   |
| Age                                     | 1.07 (1.06-1.07)             | 1.07 (1.05-1.09)           | 1.07 (1.05-1.10)           | -----             |
| Men                                     | 1.56 (1.39-1.75)             | 2.40 (2.08-2.76)           | 2.89 (2.33-3.58)           | -----             |
| Obesity                                 | 1.50 (1.37-1.65)             | 1.51 (1.36-1.68)           | 1.06 (0.88-1.28)           | 0.005             |
| Hypertension                            | 1.86 (1.67-2.08)             | 1.47 (1.32-1.65)           | 1.40 (1.19-1.65)           | 0.010             |
| Diabetes Mellitus                       | 2.47 (2.04-2.98)             | 1.74 (1.44-2.09)           | 1.58 (1.21-2.07)           | 0.015             |
| Dyslipidemia                            | 1.68 (1.53-1.85)             | 1.80 (1.62-2.01)           | 1.69 (1.44-1.99)           | 0.31              |
| Cigarette Smoking                       | 1.73 (1.58-1.90)             | 1.86 (1.68-2.06)           | 1.46 (1.24-1.73)           | 0.024             |
| Physical Inactivity                     | 1.03 (0.94-1.13)             | 1.03 (0.93-1.14)           | 1.18 (1.01-1.38)           | 0.37              |
| <b>Angina Pectoris</b>                  |                              |                            |                            |                   |
| Number of Events                        | 21,857                       | 13,881                     | 5,301                      |                   |
| Incidence Rate (per 10,000 person-year) | 37.2 (36.7-37.7)             | 77.8 (76.6-79.2)           | 111.0 (108.1-114.1)        |                   |
| Age                                     | 1.06 (1.05-1.06)             | 1.04 (1.03-1.05)           | 1.06 (1.05-1.07)           | -----             |
| Men                                     | 1.11 (1.07-1.14)             | 1.09 (1.05-1.13)           | 1.12 (1.06-1.19)           | -----             |
| Obesity                                 | 1.22 (1.19-1.26)             | 1.21 (1.16-1.26)           | 1.25 (1.17-1.33)           | 0.73              |
| Hypertension                            | 1.66 (1.59-1.72)             | 1.41 (1.36-1.47)           | 1.18 (1.11-1.25)           | <0.001            |
| Diabetes Mellitus                       | 1.55 (1.42-1.69)             | 1.37 (1.27-1.49)           | 1.25 (1.12-1.41)           | 0.010             |

|                     |                  |                  |                  |       |
|---------------------|------------------|------------------|------------------|-------|
| Dyslipidemia        | 1.22 (1.18-1.25) | 1.21 (1.17-1.25) | 1.14 (1.08-1.20) | 0.072 |
| Cigarette Smoking   | 0.99 (0.96-1.02) | 1.04 (1.00-1.08) | 1.06 (0.99-1.13) | 0.065 |
| Physical Inactivity | 1.06 (1.03-1.09) | 1.04 (1.00-1.07) | 1.10 (1.04-1.16) | 0.22  |

---

#### Stroke

---

|                                         |                  |                  |                  |        |
|-----------------------------------------|------------------|------------------|------------------|--------|
| Number of Events                        | 8,966            | 7,497            | 3,748            |        |
| Incidence Rate (per 10,000 person-year) | 15.2 (14.9-15.5) | 41.7 (40.7-42.6) | 77.9 (75.5-80.5) |        |
| Age                                     | 1.09 (1.08-1.09) | 1.07 (1.06-1.07) | 1.08 (1.07-1.10) | -----  |
| Men                                     | 0.93 (0.89-0.98) | 1.02 (0.97-1.07) | 1.04 (0.97-1.12) | -----  |
| Obesity                                 | 1.13 (1.08-1.19) | 1.05 (0.99-1.11) | 1.05 (0.97-1.14) | 0.17   |
| Hypertension                            | 2.36 (2.24-2.49) | 1.81 (1.72-1.91) | 1.46 (1.36-1.56) | <0.001 |
| Diabetes Mellitus                       | 1.39 (1.22-1.59) | 1.26 (1.13-1.41) | 1.17 (1.02-1.35) | 0.23   |
| Dyslipidemia                            | 1.10 (1.05-1.15) | 1.12 (1.07-1.17) | 1.04 (0.97-1.10) | 0.16   |
| Cigarette Smoking                       | 1.21 (1.15-1.26) | 1.18 (1.12-1.25) | 1.27 (1.17-1.37) | 0.150  |
| Physical Inactivity                     | 1.06 (1.01-1.10) | 1.06 (1.02-1.11) | 1.02 (0.95-1.08) | 0.45   |

---

#### Heart Failure

---

|                                         |                  |                  |                     |        |
|-----------------------------------------|------------------|------------------|---------------------|--------|
| Number of Events                        | 20,563           | 13,382           | 6,004               |        |
| Incidence Rate (per 10,000 person-year) | 35.0 (34.5-35.4) | 74.9 (73.6-76.1) | 125.8 (122.7-129.0) |        |
| Age                                     | 1.05 (1.05-1.05) | 1.06 (1.05-1.06) | 1.07 (1.06-1.08)    | -----  |
| Men                                     | 0.94 (0.91-0.97) | 1.17 (1.13-1.22) | 1.27 (1.20-1.34)    | -----  |
| Obesity                                 | 1.35 (1.30-1.39) | 1.29 (1.24-1.34) | 1.24 (1.17-1.32)    | 0.24   |
| Hypertension                            | 2.29 (2.21-2.38) | 1.76 (1.69-1.83) | 1.44 (1.36-1.52)    | <0.001 |
| Diabetes Mellitus                       | 1.71 (1.57-1.85) | 1.45 (1.34-1.56) | 1.32 (1.19-1.46)    | 0.002  |
| Dyslipidemia                            | 1.15 (1.11-1.18) | 1.08 (1.04-1.11) | 0.97 (0.92-1.02)    | <0.001 |

|                     |                  |                  |                  |        |
|---------------------|------------------|------------------|------------------|--------|
| Cigarette Smoking   | 1.06 (1.02-1.09) | 1.07 (1.03-1.11) | 1.13 (1.06-1.20) | <0.001 |
| Physical Inactivity | 1.00 (0.97-1.03) | 1.04 (1.00-1.08) | 1.06 (1.01-1.12) | 0.14   |

---

After excluding 373,289 participants taking blood pressure-lowering medications, glucose-lowering medications, or lipid-lowering medications, we analyzed 2,654,550 participants. Participants were categorized into three groups aged 20-49 years, 50-59 years, and 60-75 years. We performed the multivariable Cox regression analyses including age, sex, obesity, hypertension, diabetes mellitus, dyslipidemia, cigarette smoking, and physical inactivity. Hazard ratios (95% confidence interval) are presented.

**Table S5. Age Stratified Associations of Risk Factors with Incidence of Cardiovascular Disease including Body Mass Index, Systolic Blood Pressure, and Low-Density Lipoprotein Cholesterol as Continuous Variables**

|                                                  | 20-49 Years<br>(n=2,008,559) | 50-59 Years<br>(n=712,273) | 60-75 Years<br>(n=307,007) | P for<br>interaction |
|--------------------------------------------------|------------------------------|----------------------------|----------------------------|----------------------|
| <b>Myocardial Infarction</b>                     |                              |                            |                            |                      |
| Number of Events                                 | 2,573                        | 2,473                      | 1,269                      |                      |
| Incidence Rate (per 10,000 person-year)          | 4.1 (3.9-4.3)                | 10.6 (10.2-11.1)           | 16.3 (15.4-17.2)           |                      |
| Age                                              | 1.07 (1.06-1.08)             | 1.06 (1.04-1.07)           | 1.07 (1.05-1.09)           | -----                |
| Men                                              | 1.60 (1.44-1.77)             | 2.43 (2.16-2.73)           | 2.63 (2.26-3.06)           | -----                |
| Body Mass Index per 1 kg/m <sup>2</sup>          | 1.05 (1.04-1.06)             | 1.06 (1.05-1.07)           | 1.03 (1.02-1.05)           | 0.023                |
| Systolic Blood Pressure per 10 mmHg              | 1.15 (1.12-1.18)             | 1.12 (1.10-1.15)           | 1.08 (1.05-1.11)           | 0.014                |
| Diabetes Mellitus                                | 2.48 (2.18-2.83)             | 1.82 (1.63-2.02)           | 1.67 (1.46-1.92)           | <0.001               |
| Low-Density Lipoprotein Cholesterol per 10 mg/dL | 1.09 (1.08-1.10)             | 1.08 (1.07-1.09)           | 1.07 (1.06-1.08)           | 0.040                |
| Cigarette Smoking                                | 1.78 (1.64-1.92)             | 1.86 (1.72-2.02)           | 1.52 (1.34-1.71)           | 0.012                |
| Physical Inactivity                              | 1.04 (0.96-1.12)             | 1.02 (0.94-1.10)           | 1.12 (1.01-1.26)           | 0.40                 |
| <b>Angina Pectoris</b>                           |                              |                            |                            |                      |
| Number of Events                                 | 25,484                       | 20,729                     | 10,234                     |                      |
| Incidence Rate (per 10,000 person-year)          | 41.0 (40.5-41.5)             | 90.9 (89.7-92.2)           | 134.7<br>(132.2-137.4)     |                      |
| Age                                              | 1.06 (1.06-1.06)             | 1.04 (1.04-1.05)           | 1.06 (1.05-1.06)           | -----                |
| Men                                              | 1.06 (1.03-1.09)             | 1.10 (1.06-1.13)           | 1.15 (1.10-1.20)           | -----                |
| Body Mass Index per 1 kg/m <sup>2</sup>          | 1.03 (1.03-1.03)             | 1.04 (1.03-1.04)           | 1.04 (1.03-1.04)           | 0.023                |

|                                                  |                  |                  |                  |        |
|--------------------------------------------------|------------------|------------------|------------------|--------|
| Systolic Blood Pressure per 10 mmHg              | 1.12 (1.11-1.13) | 1.08 (1.07-1.09) | 1.04 (1.03-1.05) | <0.001 |
| Diabetes Mellitus                                | 1.70 (1.61-1.80) | 1.44 (1.38-1.50) | 1.27 (1.20-1.34) | <0.001 |
| Low-Density Lipoprotein Cholesterol per 10 mg/dL | 1.03 (1.02-1.03) | 1.02 (1.01-1.02) | 1.01 (1.00-1.01) | <0.001 |
| Cigarette Smoking                                | 1.01 (0.99-1.04) | 1.06 (1.03-1.10) | 1.05 (1.00-1.10) | 0.011  |
| Physical Inactivity                              | 1.06 (1.03-1.08) | 1.04 (1.01-1.07) | 1.10 (1.06-1.14) | 0.080  |

---

#### Stroke

---

|                                                  |                  |                  |                  |        |
|--------------------------------------------------|------------------|------------------|------------------|--------|
| Number of Events                                 | 10,385           | 10,877           | 6,817            |        |
| Incidence Rate (per 10,000 person-year)          | 16.6 (16.3-16.9) | 47.2 (46.3-48.1) | 88.9 (86.8-91.0) |        |
| Age                                              | 1.09 (1.09-1.10) | 1.06 (1.06-1.07) | 1.08 (1.07-1.09) | -----  |
| Men                                              | 0.89 (0.85-0.93) | 1.06 (1.02-1.11) | 1.06 (1.01-1.12) | -----  |
| Body Mass Index per 1 kg/m <sup>2</sup>          | 1.02 (1.01-1.02) | 1.01 (1.00-1.01) | 1.00 (0.99-1.01) | 0.007  |
| Systolic Blood Pressure per 10 mmHg              | 1.23 (1.21-1.25) | 1.16 (1.14-1.17) | 1.10 (1.09-1.12) | <0.001 |
| Diabetes Mellitus                                | 1.41 (1.29-1.54) | 1.37 (1.28-1.45) | 1.22 (1.14-1.30) | 0.015  |
| Low-Density Lipoprotein Cholesterol per 10 mg/dL | 1.01 (1.00-1.01) | 1.01 (1.00-1.01) | 1.00 (1.00-1.01) | 0.80   |
| Cigarette Smoking                                | 1.21 (1.15-1.26) | 1.16 (1.11-1.21) | 1.24 (1.17-1.31) | 0.055  |
| Physical Inactivity                              | 1.05 (1.01-1.09) | 1.07 (1.03-1.11) | 1.04 (0.99-1.09) | 0.65   |

---

#### Heart Failure

---

|                                         |                  |                  |                        |       |
|-----------------------------------------|------------------|------------------|------------------------|-------|
| Number of Events                        | 24,318           | 20,422           | 11,629                 |       |
| Incidence Rate (per 10,000 person-year) | 39.1 (38.6-39.6) | 89.4 (88.1-90.6) | 153.2<br>(150.5-156.0) |       |
| Age                                     | 1.05 (1.05-1.06) | 1.05 (1.05-1.06) | 1.07 (1.06-1.07)       | ----- |
| Men                                     | 0.90 (0.88-0.93) | 1.18 (1.14-1.22) | 1.21 (1.16-1.26)       | ----- |
| Body Mass Index per 1 kg/m <sup>2</sup> | 1.04 (1.04-1.05) | 1.05 (1.04-1.05) | 1.04 (1.04-1.05)       | 0.006 |

|                                                  |                  |                  |                  |        |
|--------------------------------------------------|------------------|------------------|------------------|--------|
| Systolic Blood Pressure per 10 mmHg              | 1.21 (1.20-1.22) | 1.13 (1.13-1.14) | 1.08 (1.06-1.09) | <0.001 |
| Diabetes Mellitus                                | 1.63 (1.55-1.72) | 1.36 (1.30-1.42) | 1.14 (1.08-1.20) | <0.001 |
| Low-Density Lipoprotein Cholesterol per 10 mg/dL | 1.01 (1.00-1.01) | 1.00 (0.99-1.00) | 0.98 (0.97-0.98) | <0.001 |
| Cigarette Smoking                                | 1.06 (1.03-1.09) | 1.06 (1.03-1.10) | 1.11 (1.06-1.16) | <0.001 |
| Physical Inactivity                              | 1.01 (0.98-1.03) | 1.03 (1.01-1.06) | 1.09 (1.05-1.13) | 0.026  |

---

Participants were categorized into three groups aged 20-49 years, 50-59 years, and 60-75 years. We performed the multivariable Cox regression analyses including age, sex, body mass index, systolic blood pressure, diabetes mellitus, low-density lipoprotein cholesterol, cigarette smoking, and physical inactivity. Hazard ratios (95% confidence interval) are presented.

**Table S6. Cause-Specific Hazard Ratio to Account for the Competing Risk of Death**

|                                         | 20-49 Years<br>(n=2,008,559) | 50-59 Years<br>(n=712,273) | 60-75 Years<br>(n=307,007) | P for<br>interaction |
|-----------------------------------------|------------------------------|----------------------------|----------------------------|----------------------|
| <b>Myocardial Infarction</b>            |                              |                            |                            |                      |
| Number of Events                        | 2,573                        | 2,473                      | 1,269                      |                      |
| Incidence Rate (per 10,000 person-year) | 4.1 (3.9-4.3)                | 10.6 (10.2-11.1)           | 16.3 (15.4-17.2)           |                      |
| Age                                     | 1.07 (1.06-1.07)             | 1.05 (1.03-1.06)           | 1.06 (1.05-1.08)           | -----                |
| Men                                     | 1.64 (1.48-1.83)             | 2.27 (2.02-2.55)           | 2.52 (2.16-2.94)           | -----                |
| Obesity                                 | 1.44 (1.32-1.58)             | 1.44 (1.32-1.57)           | 1.02 (0.90-1.16)           | <0.001               |
| Hypertension                            | 1.98 (1.81-2.17)             | 1.54 (1.42-1.68)           | 1.36 (1.21-1.53)           | <0.001               |
| Diabetes Mellitus                       | 2.27 (2.00-2.59)             | 1.59 (1.43-1.78)           | 1.55 (1.34-1.78)           | <0.001               |
| Dyslipidemia                            | 1.68 (1.54-1.83)             | 1.77 (1.62-1.94)           | 1.53 (1.35-1.73)           | 0.12                 |
| Cigarette Smoking                       | 1.72 (1.58-1.86)             | 1.80 (1.65-1.95)           | 1.47 (1.30-1.67)           | 0.03                 |
| Physical Inactivity                     | 1.04 (0.96-1.12)             | 1.02 (0.94-1.11)           | 1.12 (1.00-1.25)           | 0.47                 |
| <b>Angina Pectoris</b>                  |                              |                            |                            |                      |
| Number of Events                        | 25,484                       | 20,729                     | 10,234                     |                      |
| Incidence Rate (per 10,000 person-year) | 41.0 (40.5-41.5)             | 90.9 (89.7-92.2)           | 134.7<br>(132.2-137.4)     |                      |
| Age                                     | 1.06 (1.05-1.06)             | 1.03 (1.03-1.04)           | 1.05 (1.05-1.06)           | -----                |
| Men                                     | 1.10 (1.07-1.13)             | 1.09 (1.06-1.12)           | 1.15 (1.10-1.20)           | -----                |
| Obesity                                 | 1.22 (1.19-1.26)             | 1.17 (1.13-1.21)           | 1.16 (1.11-1.21)           | 0.11                 |
| Hypertension                            | 1.81 (1.76-1.87)             | 1.53 (1.48-1.57)           | 1.37 (1.32-1.43)           | <0.001               |



|                     |                  |                  |                  |        |
|---------------------|------------------|------------------|------------------|--------|
| Diabetes Mellitus   | 1.60 (1.52-1.69) | 1.36 (1.30-1.42) | 1.22 (1.16-1.29) | <0.001 |
| Dyslipidemia        | 1.24 (1.21-1.27) | 1.23 (1.20-1.27) | 1.17 (1.12-1.22) | 0.035  |
| Cigarette Smoking   | 1.00 (0.98-1.03) | 1.05 (1.02-1.08) | 1.04 (0.99-1.09) | 0.061  |
| Physical Inactivity | 1.05 (1.03-1.08) | 1.03 (1.01-1.06) | 1.10 (1.05-1.14) | 0.066  |

---

#### Stroke

---

|                                         |                  |                  |                  |        |
|-----------------------------------------|------------------|------------------|------------------|--------|
| Number of Events                        | 10,385           | 10,877           | 6,817            |        |
| Incidence Rate (per 10,000 person-year) | 16.6 (16.3-16.9) | 47.2 (46.3-48.1) | 88.9 (86.8-91.0) |        |
| Age                                     | 1.09 (1.08-1.09) | 1.06 (1.05-1.07) | 1.08 (1.07-1.08) | -----  |
| Men                                     | 0.93 (0.89-0.97) | 1.05 (1.01-1.10) | 1.04 (0.99-1.10) | -----  |
| Obesity                                 | 1.15 (1.10-1.20) | 1.03 (0.98-1.07) | 1.01 (0.95-1.07) | 0.002  |
| Hypertension                            | 2.30 (2.20-2.41) | 1.72 (1.65-1.79) | 1.49 (1.41-1.56) | <0.001 |
| Diabetes Mellitus                       | 1.32 (1.21-1.44) | 1.29 (1.21-1.37) | 1.16 (1.08-1.24) | 0.036  |
| Dyslipidemia                            | 1.12 (1.07-1.17) | 1.12 (1.08-1.17) | 1.07 (1.01-1.12) | 0.29   |
| Cigarette Smoking                       | 1.19 (1.14-1.25) | 1.15 (1.10-1.20) | 1.23 (1.16-1.31) | 0.11   |
| Physical Inactivity                     | 1.04 (1.00-1.08) | 1.06 (1.02-1.10) | 1.04 (0.99-1.09) | 0.66   |

---

#### Heart Failure

---

|                                         |                  |                  |                        |        |
|-----------------------------------------|------------------|------------------|------------------------|--------|
| Number of Events                        | 24,318           | 20,422           | 11,629                 |        |
| Incidence Rate (per 10,000 person-year) | 39.1 (38.6-39.6) | 89.4 (88.1-90.6) | 153.2<br>(150.5-156.0) |        |
| Age                                     | 1.05 (1.05-1.05) | 1.05 (1.04-1.05) | 1.06 (1.06-1.07)       | -----  |
| Men                                     | 0.94 (0.91-0.97) | 1.18 (1.15-1.22) | 1.21 (1.16-1.26)       | -----  |
| Obesity                                 | 1.35 (1.31-1.39) | 1.25 (1.21-1.29) | 1.22 (1.17-1.27)       | 0.002  |
| Hypertension                            | 2.45 (2.38-2.53) | 1.88 (1.82-1.93) | 1.62 (1.56-1.69)       | <0.001 |

|                     |                  |                  |                  |        |
|---------------------|------------------|------------------|------------------|--------|
| Diabetes Mellitus   | 1.53 (1.45-1.62) | 1.31 (1.25-1.36) | 1.12 (1.06-1.18) | <0.001 |
| Dyslipidemia        | 1.17 (1.13-1.20) | 1.10 (1.07-1.14) | 1.00 (0.97-1.04) | <0.001 |
| Cigarette Smoking   | 1.05 (1.02-1.08) | 1.06 (1.02-1.09) | 1.11 (1.06-1.16) | <0.001 |
| Physical Inactivity | 1.00 (0.98-1.03) | 1.03 (1.00-1.06) | 1.09 (1.05-1.13) | 0.012  |

---

Participants were categorized into three groups aged 20-49 years, 50-59 years, and 60-75 years. We performed the multivariable Cox regression analyses including age, sex, obesity, hypertension, diabetes mellitus, dyslipidemia, cigarette smoking, and physical inactivity. Hazard ratios (95% confidence interval) are presented.

**Table S7. Age Stratified Associations of Risk Factors with Incidence of Cardiovascular Disease after Adjustment of the Year of the Initial Health Check-up**

|                                         | 20-49 Years<br>(n=2,008,559) | 50-59 Years<br>(n=712,273) | 60-75 Years<br>(n=307,007) | P for interaction |
|-----------------------------------------|------------------------------|----------------------------|----------------------------|-------------------|
| <b>Myocardial Infarction</b>            |                              |                            |                            |                   |
| Number of Events                        | 2,573                        | 2,473                      | 1,269                      |                   |
| Incidence Rate (per 10,000 person-year) | 4.1 (3.9-4.3)                | 10.6 (10.2-11.1)           | 16.3 (15.4-17.2)           |                   |
| Age                                     | 1.07 (1.06-1.07)             | 1.05 (1.03-1.06)           | 1.06 (1.05-1.08)           | -----             |
| Men                                     | 1.64 (1.47-1.82)             | 2.30 (2.05-2.59)           | 2.59 (2.22-3.01)           | -----             |
| Obesity                                 | 1.47 (1.35-1.61)             | 1.43 (1.31-1.56)           | 1.03 (0.91-1.17)           | <0.001            |
| Hypertension                            | 1.96 (1.79-2.15)             | 1.55 (1.43-1.68)           | 1.40 (1.25-1.57)           | <0.001            |
| Diabetes Mellitus                       | 2.30 (2.02-2.61)             | 1.65 (1.48-1.83)           | 1.55 (1.35-1.78)           | <0.001            |
| Dyslipidemia                            | 1.68 (1.54-1.83)             | 1.76 (1.61-1.92)           | 1.52 (1.35-1.72)           | 0.1221            |
| Cigarette Smoking                       | 1.73 (1.60-1.88)             | 1.81 (1.67-1.96)           | 1.48 (1.31-1.67)           | 0.026             |
| Physical Inactivity                     | 1.03 (0.96-1.12)             | 1.01 (0.93-1.10)           | 1.12 (1.00-1.25)           | 0.3736            |
| <b>Angina Pectoris</b>                  |                              |                            |                            |                   |
| Number of Events                        | 25,484                       | 20,729                     | 10,234                     |                   |
| Incidence Rate (per 10,000 person-year) | 41.0 (40.5-41.5)             | 90.9 (89.7-92.2)           | 134.7 (132.2-137.4)        |                   |
| Age                                     | 1.05 (1.05-1.06)             | 1.04 (1.03-1.04)           | 1.05 (1.05-1.06)           | -----             |
| Men                                     | 1.10 (1.07-1.13)             | 1.09 (1.06-1.12)           | 1.15 (1.10-1.21)           | -----             |
| Obesity                                 | 1.22 (1.19-1.26)             | 1.17 (1.14-1.21)           | 1.16 (1.11-1.22)           | 0.1061            |
| Hypertension                            | 1.82 (1.76-1.87)             | 1.53 (1.48-1.57)           | 1.37 (1.32-1.43)           | <0.001            |
| Diabetes Mellitus                       | 1.60 (1.52-1.69)             | 1.36 (1.31-1.43)           | 1.22 (1.15-1.29)           | <0.001            |

|                     |                  |                  |                  |        |
|---------------------|------------------|------------------|------------------|--------|
| Dyslipidemia        | 1.24 (1.21-1.27) | 1.23 (1.20-1.27) | 1.17 (1.12-1.22) | 0.0244 |
| Cigarette Smoking   | 1.00 (0.98-1.03) | 1.05 (1.02-1.09) | 1.05 (1.00-1.10) | 0.0342 |
| Physical Inactivity | 1.05 (1.02-1.07) | 1.03 (1.01-1.06) | 1.10 (1.06-1.14) | 0.043  |

---

#### Stroke

---

|                                         |                  |                  |                  |        |
|-----------------------------------------|------------------|------------------|------------------|--------|
| Number of Events                        | 10,385           | 10,877           | 6,817            |        |
| Incidence Rate (per 10,000 person-year) | 16.6 (16.3-16.9) | 47.2 (46.3-48.1) | 88.9 (86.8-91.0) |        |
| Age                                     | 1.09 (1.08-1.09) | 1.06 (1.05-1.07) | 1.08 (1.07-1.09) | -----  |
| Men                                     | 0.93 (0.89-0.97) | 1.05 (1.01-1.10) | 1.04 (0.98-1.09) | -----  |
| Obesity                                 | 1.15 (1.10-1.21) | 1.03 (0.98-1.07) | 1.02 (0.96-1.08) | 0.0016 |
| Hypertension                            | 2.33 (2.23-2.45) | 1.75 (1.68-1.82) | 1.49 (1.42-1.57) | <0.001 |
| Diabetes Mellitus                       | 1.33 (1.22-1.45) | 1.29 (1.22-1.38) | 1.17 (1.09-1.25) | 0.0437 |
| Dyslipidemia                            | 1.11 (1.07-1.16) | 1.11 (1.07-1.16) | 1.05 (1.00-1.11) | 0.1705 |
| Cigarette Smoking                       | 1.20 (1.15-1.26) | 1.15 (1.11-1.20) | 1.25 (1.18-1.32) | 0.0762 |
| Physical Inactivity                     | 1.04 (1.00-1.08) | 1.06 (1.02-1.10) | 1.04 (0.99-1.09) | 0.7496 |

---

#### Heart Failure

---

|                                         |                  |                  |                     |        |
|-----------------------------------------|------------------|------------------|---------------------|--------|
| Number of Events                        | 24,318           | 20,422           | 11,629              |        |
| Incidence Rate (per 10,000 person-year) | 39.1 (38.6-39.6) | 89.4 (88.1-90.6) | 153.2 (150.5-156.0) |        |
| Age                                     | 1.05 (1.05-1.05) | 1.05 (1.04-1.05) | 1.07 (1.06-1.07)    | -----  |
| Men                                     | 0.94 (0.92-0.97) | 1.19 (1.16-1.23) | 1.23 (1.18-1.29)    | -----  |
| Obesity                                 | 1.35 (1.31-1.39) | 1.24 (1.21-1.28) | 1.22 (1.18-1.28)    | 0.0036 |
| Hypertension                            | 2.45 (2.38-2.53) | 1.87 (1.82-1.92) | 1.61 (1.55-1.68)    | <0.001 |
| Diabetes Mellitus                       | 1.55 (1.46-1.63) | 1.32 (1.26-1.38) | 1.13 (1.07-1.19)    | <0.001 |
| Dyslipidemia                            | 1.17 (1.13-1.20) | 1.10 (1.07-1.13) | 1.00 (0.96-1.04)    | <0.001 |

|                     |                  |                  |                  |        |
|---------------------|------------------|------------------|------------------|--------|
| Cigarette Smoking   | 1.06 (1.03-1.09) | 1.07 (1.03-1.10) | 1.11 (1.06-1.16) | <0.001 |
| Physical Inactivity | 1.01 (0.98-1.03) | 1.03 (1.00-1.06) | 1.08 (1.04-1.12) | 0.0429 |

---

Participants were categorized into three groups aged 20-49 years, 50-59 years, and 60-75 years. We performed the multivariable Cox regression analyses including age, sex, obesity, hypertension, diabetes mellitus, dyslipidemia, cigarette smoking, physical inactivity, and the year of the initial health check-up of each participant. Hazard ratios (95% confidence interval) are presented.

**Table S8. Age Stratified Associations of Risk Factors with Incidence of Cardiovascular Disease (Stratified by Tertile)**

|                                         | 1st (20-40 years)<br>(n=1,062,801) | 2nd (41-50 years)<br>(n=1,038,138) | 3rd (51-75 years)<br>(n=926,900) | P for interaction |
|-----------------------------------------|------------------------------------|------------------------------------|----------------------------------|-------------------|
| <b>Myocardial Infarction</b>            |                                    |                                    |                                  |                   |
| Number of Events                        | 675                                | 2,176                              | 3,464                            |                   |
| Incidence Rate (per 10,000 person-year) | 2.3 (2.1-2.5)                      | 5.9 (5.7-6.2)                      | 12.5 (12.0-12.9)                 |                   |
| Age                                     | 1.06 (1.05-1.08)                   | 1.06 (1.05-1.08)                   | 1.05 (1.04-1.06)                 | -----             |
| Men                                     | 1.43 (1.18-1.73)                   | 1.75 (1.55-1.97)                   | 2.46 (2.23-2.71)                 | -----             |
| Obesity                                 | 1.46 (1.23-1.74)                   | 1.51 (1.37-1.65)                   | 1.26 (1.17-1.36)                 | 0.0316            |
| Hypertension                            | 1.77 (1.43-2.19)                   | 2.01 (1.83-2.21)                   | 1.46 (1.36-1.57)                 | <0.001            |
| Diabetes Mellitus                       | 2.18 (1.53-3.09)                   | 2.09 (1.83-2.38)                   | 1.64 (1.50-1.79)                 | 0.0068            |
| Dyslipidemia                            | 1.55 (1.31-1.84)                   | 1.74 (1.58-1.92)                   | 1.67 (1.55-1.80)                 | 0.3321            |
| Cigarette Smoking                       | 1.58 (1.34-1.85)                   | 1.82 (1.66-1.98)                   | 1.68 (1.56-1.80)                 | 0.0975            |
| Physical Inactivity                     | 1.11 (0.95-1.29)                   | 0.99 (0.91-1.08)                   | 1.05 (0.98-1.13)                 | 0.3168            |
| <b>Angina Pectoris</b>                  |                                    |                                    |                                  |                   |
| Number of Events                        | 7,817                              | 20,026                             | 28,604                           |                   |
| Incidence Rate (per 10,000 person-year) | 27.0 (26.4-27.6)                   | 55.1 (54.4-55.9)                   | 105.1 (103.9-106.3)              |                   |
| Age                                     | 1.05 (1.05-1.06)                   | 1.05 (1.05-1.06)                   | 1.04 (1.04-1.04)                 | -----             |
| Men                                     | 1.05 (1.00-1.10)                   | 1.12 (1.08-1.15)                   | 1.12 (1.09-1.15)                 | -----             |
| Obesity                                 | 1.22 (1.15-1.29)                   | 1.21 (1.17-1.25)                   | 1.17 (1.14-1.20)                 | 0.4613            |
| Hypertension                            | 1.81 (1.69-1.94)                   | 1.79 (1.73-1.85)                   | 1.46 (1.42-1.50)                 | <0.001            |
| Diabetes Mellitus                       | 1.59 (1.39-1.83)                   | 1.56 (1.47-1.64)                   | 1.30 (1.26-1.35)                 | <0.001            |
| Dyslipidemia                            | 1.24 (1.18-1.31)                   | 1.24 (1.21-1.28)                   | 1.21 (1.18-1.24)                 | 0.1142            |

|                     |                  |                  |                  |        |
|---------------------|------------------|------------------|------------------|--------|
| Cigarette Smoking   | 0.94 (0.90-0.99) | 1.04 (1.01-1.07) | 1.05 (1.02-1.07) | <0.001 |
| Physical Inactivity | 1.06 (1.01-1.11) | 1.05 (1.02-1.08) | 1.05 (1.03-1.07) | 0.819  |

---

#### Stroke

---

|                                         |                  |                  |                  |        |
|-----------------------------------------|------------------|------------------|------------------|--------|
| Number of Events                        | 2,546            | 9,010            | 16,523           |        |
| Incidence Rate (per 10,000 person-year) | 8.8 (8.4-9.1)    | 24.6 (24.1-25.1) | 60.0 (59.1-61.0) |        |
| Age                                     | 1.08 (1.07-1.09) | 1.08 (1.08-1.09) | 1.07 (1.06-1.07) | -----  |
| Men                                     | 0.90 (0.82-0.98) | 0.96 (0.91-1.00) | 1.06 (1.02-1.09) | -----  |
| Obesity                                 | 1.11 (1.00-1.22) | 1.14 (1.08-1.19) | 1.02 (0.99-1.06) | 0.0092 |
| Hypertension                            | 2.90 (2.61-3.23) | 2.18 (2.08-2.29) | 1.62 (1.57-1.67) | <0.001 |
| Diabetes Mellitus                       | 1.35 (1.06-1.71) | 1.31 (1.21-1.43) | 1.23 (1.18-1.29) | 0.3531 |
| Dyslipidemia                            | 1.12 (1.02-1.23) | 1.11 (1.06-1.16) | 1.09 (1.06-1.13) | 0.8713 |
| Cigarette Smoking                       | 1.23 (1.13-1.34) | 1.18 (1.13-1.24) | 1.19 (1.15-1.24) | 0.4065 |
| Physical Inactivity                     | 1.07 (0.99-1.16) | 1.05 (1.01-1.10) | 1.04 (1.01-1.08) | 0.7357 |

---

#### Heart Failure

---

|                                         |                  |                  |                     |        |
|-----------------------------------------|------------------|------------------|---------------------|--------|
| Number of Events                        | 7,489            | 19,034           | 29,846              |        |
| Incidence Rate (per 10,000 person-year) | 25.8 (25.3-26.4) | 52.3 (51.5-53.0) | 109.5 (108.2-110.7) |        |
| Age                                     | 1.05 (1.04-1.05) | 1.05 (1.05-1.06) | 1.05 (1.05-1.06)    | -----  |
| Men                                     | 0.91 (0.87-0.96) | 0.97 (0.94-1.00) | 1.21 (1.18-1.25)    | -----  |
| Obesity                                 | 1.39 (1.32-1.47) | 1.32 (1.27-1.36) | 1.25 (1.22-1.28)    | 0.017  |
| Hypertension                            | 2.71 (2.55-2.89) | 2.36 (2.28-2.44) | 1.75 (1.71-1.79)    | <0.001 |
| Diabetes Mellitus                       | 1.59 (1.39-1.81) | 1.51 (1.43-1.59) | 1.23 (1.19-1.27)    | <0.001 |
| Dyslipidemia                            | 1.12 (1.06-1.18) | 1.18 (1.14-1.22) | 1.06 (1.03-1.08)    | <0.001 |
| Cigarette Smoking                       | 0.98 (0.93-1.03) | 1.09 (1.06-1.13) | 1.08 (1.05-1.11)    | <0.001 |

|                     |                  |                  |                  |        |
|---------------------|------------------|------------------|------------------|--------|
| Physical Inactivity | 1.02 (0.97-1.07) | 1.00 (0.97-1.03) | 1.05 (1.03-1.07) | 0.0326 |
|---------------------|------------------|------------------|------------------|--------|

---

Participants were categorized into three groups aged 20-40 years, 41-50 years, and 51-75 years. We performed the multivariable Cox regression analyses including age, sex, obesity, hypertension, diabetes mellitus, dyslipidemia, cigarette smoking, and physical inactivity. Hazard ratios (95% confidence interval) are presented.



**Table S9. Age Stratified Associations of Risk Factors with Incidence of Cardiovascular Disease after Excluding People Aged > 60 Years**

|                                         | 20-44 Years<br>(n=1,505,097) | 45-54 Years<br>(n=911,688) | 55-60 Years<br>(n=354,498) | P for interaction |
|-----------------------------------------|------------------------------|----------------------------|----------------------------|-------------------|
| <b>Myocardial Infarction</b>            |                              |                            |                            |                   |
| Number of Events                        | 1,406                        | 2,476                      | 1,348                      |                   |
| Incidence Rate (per 10,000 person-year) | 3.1 (3.0-3.3)                | 7.8 (7.5-8.2)              | 12.6 (12.0-13.3)           |                   |
| Age                                     | 1.07 (1.05-1.08)             | 1.05 (1.04-1.07)           | 1.02 (0.99-1.06)           | -----             |
| Men                                     | 1.49 (1.30-1.71)             | 1.99 (1.77-2.23)           | 2.55 (2.17-2.98)           | -----             |
| Obesity                                 | 1.44 (1.28-1.63)             | 1.52 (1.40-1.66)           | 1.27 (1.13-1.43)           | 0.1937            |
| Hypertension                            | 2.01 (1.76-2.29)             | 1.86 (1.71-2.02)           | 1.30 (1.16-1.45)           | <0.001            |
| Diabetes Mellitus                       | 2.71 (2.24-3.28)             | 1.70 (1.51-1.91)           | 1.72 (1.50-1.97)           | <0.001            |
| Dyslipidemia                            | 1.63 (1.45-1.83)             | 1.73 (1.58-1.89)           | 1.77 (1.57-2.00)           | 0.3116            |
| Cigarette Smoking                       | 1.75 (1.57-1.96)             | 1.86 (1.71-2.02)           | 1.69 (1.51-1.89)           | 0.168             |
| Physical Inactivity                     | 1.09 (0.98-1.22)             | 1.00 (0.93-1.09)           | 1.01 (0.91-1.13)           | 0.3422            |
| <b>Angina Pectoris</b>                  |                              |                            |                            |                   |
| Number of Events                        | 14,938                       | 21,932                     | 10,907                     |                   |
| Incidence Rate (per 10,000 person-year) | 33.3 (32.8-33.9)             | 70.7 (69.8-71.6)           | 104.5 (102.5-106.4)        |                   |
| Age                                     | 1.05 (1.05-1.06)             | 1.05 (1.04-1.05)           | 1.02 (1.01-1.03)           | -----             |
| Men                                     | 1.09 (1.05-1.13)             | 1.11 (1.08-1.14)           | 1.08 (1.03-1.13)           | -----             |
| Obesity                                 | 1.21 (1.16-1.26)             | 1.21 (1.17-1.24)           | 1.16 (1.11-1.21)           | 0.149             |
| Hypertension                            | 1.89 (1.80-1.97)             | 1.65 (1.60-1.70)           | 1.47 (1.41-1.53)           | <0.001            |
| Diabetes Mellitus                       | 1.68 (1.55-1.82)             | 1.44 (1.37-1.51)           | 1.34 (1.26-1.41)           | <0.001            |

|                     |                  |                  |                  |        |
|---------------------|------------------|------------------|------------------|--------|
| Dyslipidemia        | 1.24 (1.20-1.29) | 1.25 (1.21-1.28) | 1.20 (1.15-1.25) | 0.4104 |
| Cigarette Smoking   | 0.98 (0.94-1.02) | 1.05 (1.02-1.08) | 1.05 (1.01-1.10) | 0.0033 |
| Physical Inactivity | 1.05 (1.02-1.09) | 1.04 (1.01-1.07) | 1.06 (1.02-1.10) | 0.8284 |

---

#### Stroke

---

|                                         |                  |                  |                  |        |
|-----------------------------------------|------------------|------------------|------------------|--------|
| Number of Events                        | 5,442            | 10,518           | 6,267            |        |
| Incidence Rate (per 10,000 person-year) | 12.1 (11.8-12.4) | 33.5 (32.9-34.2) | 59.4 (58.0-60.9) |        |
| Age                                     | 1.09 (1.08-1.09) | 1.06 (1.05-1.06) | 1.05 (1.03-1.06) | -----  |
| Men                                     | 0.91 (0.85-0.96) | 0.99 (0.94-1.03) | 1.09 (1.03-1.15) | -----  |
| Obesity                                 | 1.16 (1.09-1.24) | 1.07 (1.02-1.12) | 1.01 (0.96-1.07) | 0.0554 |
| Hypertension                            | 2.53 (2.36-2.70) | 2.00 (1.92-2.08) | 1.65 (1.56-1.73) | <0.001 |
| Diabetes Mellitus                       | 1.41 (1.23-1.62) | 1.33 (1.23-1.42) | 1.26 (1.16-1.36) | 0.3355 |
| Dyslipidemia                            | 1.17 (1.10-1.24) | 1.10 (1.05-1.14) | 1.10 (1.04-1.15) | 0.2133 |
| Cigarette Smoking                       | 1.22 (1.15-1.30) | 1.16 (1.11-1.21) | 1.20 (1.13-1.27) | 0.5945 |
| Physical Inactivity                     | 1.05 (0.99-1.11) | 1.05 (1.01-1.09) | 1.08 (1.02-1.13) | 0.8687 |

---

#### Heart Failure

---

|                                         |                  |                  |                     |        |
|-----------------------------------------|------------------|------------------|---------------------|--------|
| Number of Events                        | 14,199           | 21,066           | 11,209              |        |
| Incidence Rate (per 10,000 person-year) | 31.6 (31.1-32.2) | 67.7 (66.8-68.6) | 107.2 (105.2-109.2) |        |
| Age                                     | 1.05 (1.04-1.05) | 1.05 (1.04-1.05) | 1.05 (1.04-1.06)    | -----  |
| Men                                     | 0.92 (0.89-0.95) | 1.06 (1.02-1.09) | 1.25 (1.20-1.31)    | -----  |
| Obesity                                 | 1.38 (1.33-1.44) | 1.28 (1.24-1.32) | 1.23 (1.18-1.28)    | 0.0118 |
| Hypertension                            | 2.64 (2.53-2.75) | 2.12 (2.06-2.19) | 1.74 (1.67-1.81)    | <0.001 |
| Diabetes Mellitus                       | 1.67 (1.55-1.81) | 1.37 (1.31-1.44) | 1.30 (1.23-1.37)    | <0.001 |
| Dyslipidemia                            | 1.15 (1.10-1.19) | 1.15 (1.11-1.18) | 1.08 (1.03-1.12)    | 0.042  |

|                     |                  |                  |                  |        |
|---------------------|------------------|------------------|------------------|--------|
| Cigarette Smoking   | 1.03 (0.99-1.07) | 1.08 (1.05-1.12) | 1.06 (1.02-1.11) | <0.001 |
| Physical Inactivity | 1.01 (0.98-1.05) | 1.01 (0.98-1.04) | 1.04 (1.00-1.08) | 0.3364 |

---

Participants were categorized into three groups aged 20-44 years, 45-54 years, and 55-60 years. We performed the multivariable Cox regression analyses including age, sex, obesity, hypertension, diabetes mellitus, dyslipidemia, cigarette smoking, and physical inactivity. Hazard ratios (95% confidence interval) are presented.

**Table S10. Age Stratified Associations of Risk Factors with All-Cause Death**

|                                         | 20-49 Years<br>(n=2,008,559) | 50-59 Years<br>(n=712,273) | 60-75 Years<br>(n=307,007) | P for interaction |
|-----------------------------------------|------------------------------|----------------------------|----------------------------|-------------------|
| <b>All-Cause Death</b>                  |                              |                            |                            |                   |
| Number of Events                        | 1,492                        | 1,621                      | 1,205                      |                   |
| Incidence Rate (per 10,000 person-year) | 2.4 (2.3-2.5)                | 7.0 (6.6-7.3)              | 15.4 (14.6-16.3)           |                   |
| Age                                     | 1.07 (1.06-1.08)             | 1.09 (1.07-1.11)           | 1.15 (1.13-1.17)           | -----             |
| Men                                     | 1.38 (1.22-1.57)             | 1.73 (1.52-1.97)           | 2.32 (1.99-2.71)           | -----             |
| Obesity                                 | 1.06 (0.94-1.20)             | 0.91 (0.82-1.02)           | 1.01 (0.89-1.16)           | 0.2406            |
| Hypertension                            | 2.03 (1.79-2.30)             | 1.58 (1.42-1.75)           | 1.32 (1.17-1.48)           | <0.001            |
| Diabetes Mellitus                       | 1.78 (1.45-2.19)             | 1.78 (1.55-2.05)           | 1.55 (1.34-1.79)           | 0.6042            |
| Dyslipidemia                            | 1.08 (0.97-1.21)             | 0.91 (0.83-1.01)           | 0.87 (0.77-0.98)           | 0.0712            |
| Cigarette Smoking                       | 1.70 (1.53-1.90)             | 1.59 (1.44-1.77)           | 1.76 (1.55-1.99)           | 0.3601            |
| Physical Inactivity                     | 1.00 (0.90-1.10)             | 1.14 (1.03-1.26)           | 1.14 (1.01-1.28)           | 0.1999            |

Participants were categorized into three groups aged 20-49 years, 50-59 years, and 60-75 years. We performed the multivariable Cox regression analyses including age, sex, obesity, hypertension, diabetes mellitus, dyslipidemia, cigarette smoking, and physical inactivity. Hazard ratios (95% confidence interval) are presented.
